# Supplementary material for: Comparison of PM2.5 carbonaceous pollutants between an urban site in Shanghai and a background site in a coastal East China Sea island in summer: concentration, composition and sources
Source: Royal Society of Chemistry journal article supplement (doi:10.1039/c7em00129k), 2017-01-01

**Comparison of PM<sub>2.5</sub> carbonaceous pollutants between an urban site in Shanghai and a background island in Coastal East China Sea in  
summer: Concentration, Composition and Sources**

Fengwen Wang<sup>abc\*</sup>, Tian Lin<sup>d</sup>, Yuanyuan Li<sup>b</sup>, Zhigang Guo<sup>b</sup>, Neil L. Rose<sup>e</sup>

<sup>a</sup>State Key Laboratory of Coal Mine Disaster Dynamics and Control, Chongqing University, Chongqing 400030, China

<sup>b</sup>Shanghai Key Laboratory of Atmospheric Particle Pollution and Prevention (LAP<sup>3</sup>), Fudan University, Shanghai 200433, China

<sup>c</sup>Department of Environmental Science, College of Resources and Environmental Science, Chongqing University, Chongqing 400030, China

<sup>d</sup>State Key Laboratory of Environmental Geochemistry, Institute of Geochemistry, Chinese Academy of Sciences, Guiyang 550002, China

<sup>e</sup>Environmental Change Research Centre, University College London, Gower Street, London WC1E 6BT, United Kingdom

\*Corresponding author: [fengwenwang@cqu.edu.cn](mailto:fengwenwang@cqu.edu.cn)

Table S1 The complete forms of targeted 10 hopanes and 12 steranes in this study.

| hopanes (10 species)           |                                                                                        |
|--------------------------------|----------------------------------------------------------------------------------------|
| Ts                             | 18 $\alpha$ (H)-22,29,30-trisnorneohopane                                              |
| Tm                             | 17 $\alpha$ (H)-22,29,30-trisnorhopane                                                 |
| C29 $\alpha\beta$              | 17 $\alpha$ (H),21 $\beta$ (H)-norhopane                                               |
| C29 $\beta\alpha$              | 17 $\beta$ (H),21 $\alpha$ (H)-norhopane                                               |
| C30 $\alpha\beta$              | 17 $\alpha$ (H),21 $\beta$ (H)-hopane                                                  |
| C30 $\beta\alpha$              | 17 $\beta$ (H),21 $\alpha$ (H)-hopane                                                  |
| C31S                           | 22S-17 $\alpha$ (H),21 $\beta$ (H)-homohopane                                          |
| C31R                           | 22R-17 $\alpha$ (H),21 $\beta$ (H)-homohopane                                          |
| C32S                           | 22S-17 $\alpha$ (H),21 $\beta$ (H)-bishomohopane                                       |
| C32R                           | 22R-17 $\alpha$ (H),21 $\beta$ (H)-bishomohopane                                       |
| steranes (12 species)          |                                                                                        |
| C27 $\alpha\alpha\alpha$ (20S) | Where $\alpha\alpha\alpha$ = 5 $\alpha$ (H), 14 $\alpha$ (H), 17 $\alpha$ (H)-steranes |
| C27 $\alpha\beta\beta$ (20R)   | $\alpha\beta\beta$ = 5 $\alpha$ (H), 14 $\beta$ (H), 17 $\beta$ (H)-steranes           |
| C27 $\alpha\beta\beta$ (20S)   | 20R = C-20R                                                                            |
| C27 $\alpha\alpha\alpha$ (20R) | 20s=C-20S                                                                              |
| C28 $\alpha\alpha\alpha$ (20S) |                                                                                        |
| C28 $\alpha\beta\beta$ (20R)   |                                                                                        |
| C28 $\alpha\beta\beta$ (20S)   |                                                                                        |
| C28 $\alpha\alpha\alpha$ (20R) |                                                                                        |
| C29 $\alpha\alpha\alpha$ (20S) |                                                                                        |
| C29 $\alpha\beta\beta$ (20R)   |                                                                                        |
| C29 $\alpha\beta\beta$ (20S)   |                                                                                        |
| C29 $\alpha\alpha\alpha$ (20R) |                                                                                        |

Table S2 Individual PAH and *n*-alkanes in all PM<sub>2.5</sub> samples (in ng/m<sup>3</sup>), “-” indicates “under detection limit”.

| Shanghai  | Nap  | Ac   | Ace  | Fl   | Phe  | Ant  | Flu  | Pyr  | BaA  | Chr  | BbF  | BkF  | BaP  | IP   | DBA  | BghiP |
|-----------|------|------|------|------|------|------|------|------|------|------|------|------|------|------|------|-------|
| 7/21/2011 | 0.27 | 0.04 | 0.29 | 0.23 | 0.93 | 0.1  | 0.81 | 0.66 | 0.29 | 0.84 | 1.91 | 0.6  | 0.47 | 1.8  | 0.65 | 1.27  |
| 7/22/2011 | 0.29 | 0.05 | 0.3  | 0.25 | 1.09 | 0.12 | 0.78 | 0.63 | 0.23 | 0.47 | 1.29 | 0.4  | 0.43 | 1.17 | 0.38 | 0.86  |
| 7/23/2011 | 0.25 | 0.04 | 0.27 | 0.22 | 0.73 | 0.1  | 0.37 | 0.28 | 0.15 | 0.25 | 1.02 | 0.28 | 0.18 | 0.9  | 0.37 | 0.6   |
| 7/24/2011 | 0.24 | 0.04 | 0.23 | 0.18 | 0.73 | 0.08 | 0.42 | 0.32 | 0.17 | 0.3  | 0.91 | 0.26 | 0.18 | 1.6  | 0.25 | 0.58  |
| 7/25/2011 | 0.27 | 0.04 | 0.22 | 0.18 | 0.77 | 0.09 | 0.36 | 0.26 | 0.17 | 0.13 | 1.44 | 0.36 | 0.15 | 1.18 | 0.43 | 0.89  |
| 7/26/2011 | 0.24 | 0.04 | 0.2  | 0.18 | 0.8  | 0.13 | 0.97 | 0.67 | 0.55 | 0.9  | 1.85 | 0.56 | 0.63 | 1.47 | 0.81 | 0.94  |
| 7/27/2011 | 0.25 | 0.04 | 0.21 | 0.17 | 0.73 | 0.09 | 0.8  | 0.59 | 0.52 | 0.97 | 2.34 | 0.69 | 0.42 | 1.84 | 0.85 | 1.24  |
| 7/28/2011 | 0.29 | 0.03 | 0.27 | 0.18 | 0.75 | 0.11 | 0.44 | 0.35 | 0.18 | 0.37 | 1.45 | 0.35 | 0.13 | 1.21 | 0.5  | 0.86  |
| 7/29/2011 | 0.3  | 0.04 | 0.27 | 0.19 | 0.72 | 0.08 | 0.54 | 0.42 | 0.22 | 0.34 | 1.05 | 0.28 | 0.15 | 0.85 | 0.3  | 0.64  |
| HNI       | Nap  | Ac   | Ace  | Fl   | Phe  | Ant  | Flu  | Pyr  | BaA  | Chr  | BbF  | BkF  | BaP  | IP   | DBA  | BghiP |
| 7/21/2011 | 0.23 | 0.03 | 0.24 | 0.15 | 0.43 | 0.03 | 0.15 | 0.1  | 0.07 | 0.06 | 0.1  | 0.04 | 0.09 | 0.06 | -    | 0.04  |
| 7/22/2011 | 0.15 | 0.03 | 0.23 | 0.17 | 0.61 | 0.05 | 0.2  | 0.12 | 0.05 | 0.05 | 0.07 | 0.03 | 0.07 | 0.02 | -    | 0.02  |
| 7/23/2011 | 0.28 | 0.04 | 0.3  | 0.22 | 0.77 | 0.05 | 0.24 | 0.14 | 0.05 | 0.05 | 0.07 | 0.03 | 0.06 | 0.04 | -    | 0.03  |
| 7/24/2011 | 0.25 | 0.03 | 0.14 | 0.2  | 0.58 | 0.04 | 0.18 | 0.1  | 0.03 | 0.03 | 0.05 | 0.03 | 0.05 | 0.02 | -    | 0.02  |
| 7/25/2011 | 0.2  | 0.03 | 0.26 | 0.19 | 0.62 | 0.05 | 0.19 | 0.12 | 0.03 | 0.03 | 0.06 | 0.03 | 0.06 | 0.04 | -    | 0.03  |
| 7/26/2011 | 0.23 | 0.03 | 0.22 | 0.18 | 0.57 | 0.04 | 0.16 | 0.09 | 0.03 | 0.05 | 0.02 | 0.01 | 0.02 | -    | -    | -     |
| 7/27/2011 | 0.22 | 0.03 | 0.24 | 0.18 | 0.52 | 0.06 | 0.14 | 0.09 | -    | -    | -    | -    | -    | -    | -    | -     |
| 7/28/2011 | 0.27 | 0.03 | 0.26 | 0.22 | 0.72 | 0.06 | 0.21 | 0.11 | 0.03 | 0.03 | 0.02 | 0.01 | 0.03 | -    | -    | -     |
| 7/29/2011 | 0.23 | 0.03 | 0.21 | 0.18 | 0.59 | 0.04 | 0.17 | 0.09 | 0.02 | 0.02 | 0.01 | 0.01 | 0.01 | -    | -    | -     |

| Shanghai  | C14  | C15  | C16  | C17  | C18  | C19  | C20  | C21  | C22  | C23  | C24   | C25   | C26  | C27  | C28   | C29   | C30   | C31   | C32  | C33  |
|-----------|------|------|------|------|------|------|------|------|------|------|-------|-------|------|------|-------|-------|-------|-------|------|------|
| 7/21/2011 | 0.32 | 0.3  | 0.41 | 0.3  | 0.33 | 0.43 | 1.57 | 1.56 | 1.31 | 2.31 | 4.18  | 9.67  | 0.75 | 0.99 | 10.58 | 14.26 | 10.81 | 12.51 | 5.76 | 3.52 |
| 7/22/2011 | 0.27 | 0.22 | 0.36 | 0.25 | 0.25 | 0.29 | 0.34 | 0.9  | 0.95 | 1.69 | 2.65  | 7.13  | 0.34 | 0.52 | 3.63  | 6.7   | 2.56  | 4.64  | 0.88 | 1.52 |
| 7/23/2011 | 0.3  | 0.31 | 0.5  | 0.38 | 0.37 | 0.38 | 0.41 | 0.7  | 1.21 | 1.78 | 27.25 | 7.5   | 0.46 | 0.76 | 7.61  | 13.9  | 8.03  | 10.99 | 3.63 | 4.09 |
| 7/24/2011 | 0.23 | 0.26 | 0.28 | 0.23 | 0.25 | 0.3  | 0.28 | 0.99 | 0.86 | 1.77 | 2.8   | 6.28  | 0.39 | 0.55 | 2.98  | 7.5   | 2.19  | 4.64  | 0.79 | 1.26 |
| 7/25/2011 | 0.38 | 0.31 | 0.51 | 0.45 | 0.6  | 0.53 | 0.55 | 1.41 | 1.26 | 2.01 | 3.31  | 6.6   | 0.47 | 0.69 | 5.45  | 9.06  | 2.72  | 8.92  | 1.91 | 3.92 |
| 7/26/2011 | 0.3  | 0.27 | 0.36 | 0.32 | 0.33 | 0.33 | 0.36 | 1.15 | 2.29 | 1.01 | 3.02  | 3.81  | 0.23 | 0.47 | 2.52  | 8.95  | 2.34  | 7.17  | 1.17 | 2.08 |
| 7/27/2011 | 0.55 | 0.47 | 0.79 | 0.69 | 0.89 | 0.94 | 1.35 | 1.75 | 2.74 | 3.87 | 7.03  | 17.09 | 1.86 | 2.57 | 24.69 | 28.59 | 15.89 | 24.51 | 5.17 | 5.84 |
| 7/28/2011 | 0.31 | 0.26 | 0.35 | 0.28 | 0.36 | 0.32 | 0.4  | 0.89 | 1.17 | 1.86 | 3.24  | 16.4  | 0.58 | 0.73 | 6.61  | 9.42  | 5.72  | 5.87  | 2.08 | 1.84 |
| 7/29/2011 | 0.4  | 0.37 | 0.54 | 0.5  | 0.52 | 0.59 | 0.76 | 1.21 | 1.74 | 2.32 | 4.53  | 9.82  | 0.84 | 1.09 | 10.37 | 12.03 | 5.92  | 11.23 | 3.06 | 3.12 |
| HNI       | C14  | C15  | C16  | C17  | C18  | C19  | C20  | C21  | C22  | C23  | C24   | C25   | C26  | C27  | C28   | C29   | C30   | C31   | C32  | C33  |
| 7/21/2011 | 0.09 | 0.12 | 0.09 | 0.06 | 0.04 | 0.04 | 0.07 | 0.1  | 0.2  | 0.44 | 0.69  | 0.83  | 1.06 | 1.25 | 1.27  | 1.96  | 2.25  | 2.6   | 2.11 | 1.37 |
| 7/22/2011 | 0.14 | 0.16 | 0.13 | 0.08 | 0.06 | 0.06 | 0.09 | 0.15 | 0.24 | 0.51 | 0.77  | 0.9   | 1.12 | 1.45 | 1.7   | 2.58  | 3.69  | 4.01  | 3.57 | 1.96 |
| 7/23/2011 | 0.09 | 0.1  | 0.09 | 0.04 | 0.03 | 0.03 | 0.05 | 0.08 | 0.13 | 0.27 | 0.4   | 0.48  | 0.57 | 0.58 | 0.43  | 0.48  | 0.29  | 0.33  | 0.16 | 0.18 |
| 7/24/2011 | 0.09 | 0.09 | 0.09 | 0.06 | 0.04 | 0.05 | 0.06 | 0.09 | 0.15 | 0.27 | 0.4   | 0.43  | 0.51 | 0.54 | 0.4   | 0.42  | 0.3   | 0.36  | 0.19 | 0.16 |
| 7/25/2011 | 0.13 | 0.11 | 0.09 | 0.05 | 0.05 | 0.05 | 0.09 | 0.11 | 0.17 | 0.32 | 0.43  | 0.54  | 0.58 | 0.63 | 0.51  | 0.64  | 0.42  | 0.51  | 0.4  | 0.43 |
| 7/26/2011 | 0.22 | 0.21 | 0.18 | 0.09 | 0.08 | 0.08 | 0.09 | 0.1  | 0.19 | 0.34 | 0.52  | 0.56  | 0.75 | 0.82 | 0.53  | 0.59  | 0.35  | 0.42  | 0.19 | 0.33 |
| 7/27/2011 | 0.2  | 0.19 | 0.16 | 0.08 | 0.07 | 0.07 | 0.08 | 0.1  | 0.16 | 0.31 | 0.48  | 0.55  | 0.61 | 0.68 | 0.6   | 0.7   | 0.45  | 0.61  | 0.36 | 0.39 |
| 7/28/2011 | 0.1  | 0.12 | 0.11 | 0.07 | 0.07 | 0.05 | 0.06 | 0.06 | 0.09 | 0.17 | 0.22  | 0.28  | 0.31 | 0.37 | 0.33  | 0.44  | 0.32  | 0.52  | 0.23 | 0.35 |
| 7/29/2011 | 0.12 | 0.17 | 0.12 | 0.07 | 0.06 | 0.05 | 0.07 | 0.07 | 0.1  | -    | 0.27  | 0.26  | 0.32 | 0.31 | 0.21  | 0.26  | 0.18  | 0.23  | 0.1  | 0.16 |

Figure S1 The biplot with scores and loadings using correlation matrix of selected 8 PAHs in PM<sub>2.5</sub> collected at Shanghai.

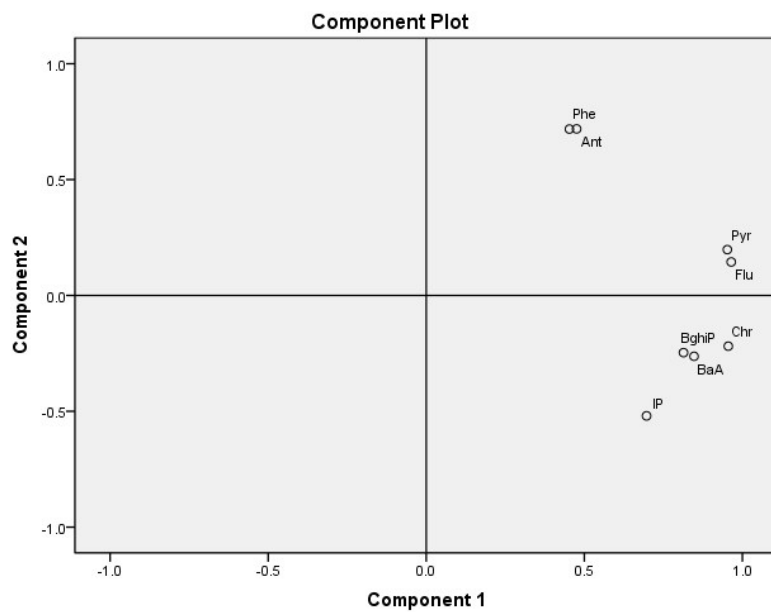

Figure S2 The biplot with scores and loadings using correlation matrix of selected 8 PAHs in PM<sub>2.5</sub> collected at HNI.

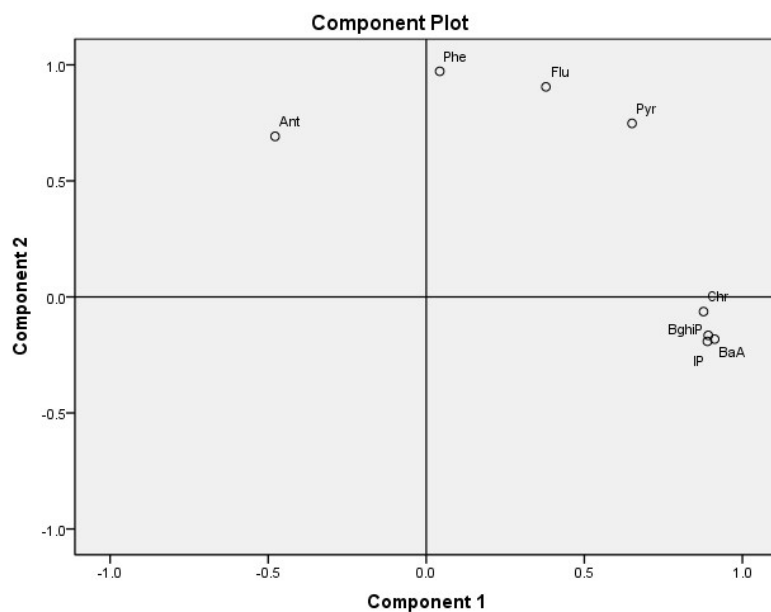

Figure S3 The biplot with scores and loadings using correlation matrix of selected 8 *n*-alkanes in PM<sub>2.5</sub> collected at Shanghai.

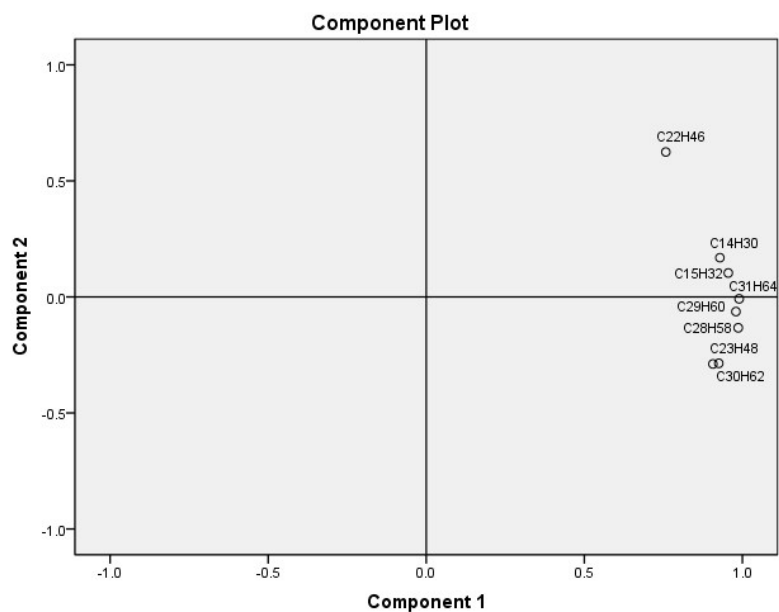

Figure S4 The biplot with scores and loadings using correlation matrix of selected 8 *n*-alkanes in PM<sub>2.5</sub> collected at HNI.

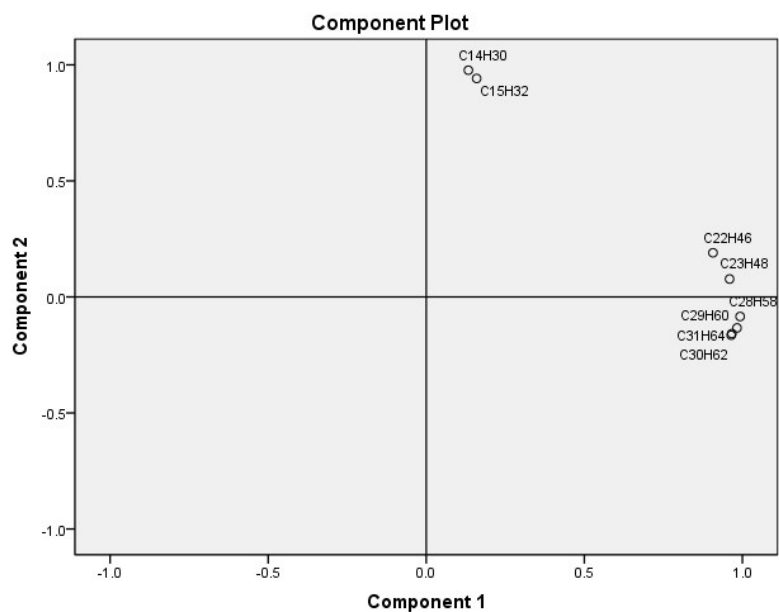

Supplement: c7em00129k1.pdf [file c7em00129k1.pdf]
